# Supplementary material for: Simulating the isotropic Raman spectra of O–H stretching mode in liquid H2O based on a machine learning potential: the influence of vibrational couplings
Source: Royal Society of Chemistry journal article supplement (doi:10.1039/d3cp03035k), 2023-01-01

**Simulating Isotropic Raman Spectra of O-H Stretching  
Mode in Liquid H<sub>2</sub>O based on a Machine Learning Potential:  
the Influence of Vibrational Couplings**

**Hujun Shen,<sup>1\*</sup> Xu Shen,<sup>2</sup> Zhenhua Wu<sup>3</sup>**

- 1. Guizhou Provincial Key Laboratory of Computational Nano-Material Science, Guizhou Education University, Guiyang 550018, China.*
- 2. National Center of Technology Innovation for Intelligent Design and Numerical Control, Huazhong University of Science and Technology, Wuhan, 430074, China*
- 3. Department of Big Data and Artificial Intelligence, Guizhou Vocational Technology College of Electronics & Information, Kaili, 556000, China.*

**Supporting Information**

**Figure S1.** Learning curves of (A) energy and (B) force for training set in terms of RMSE.

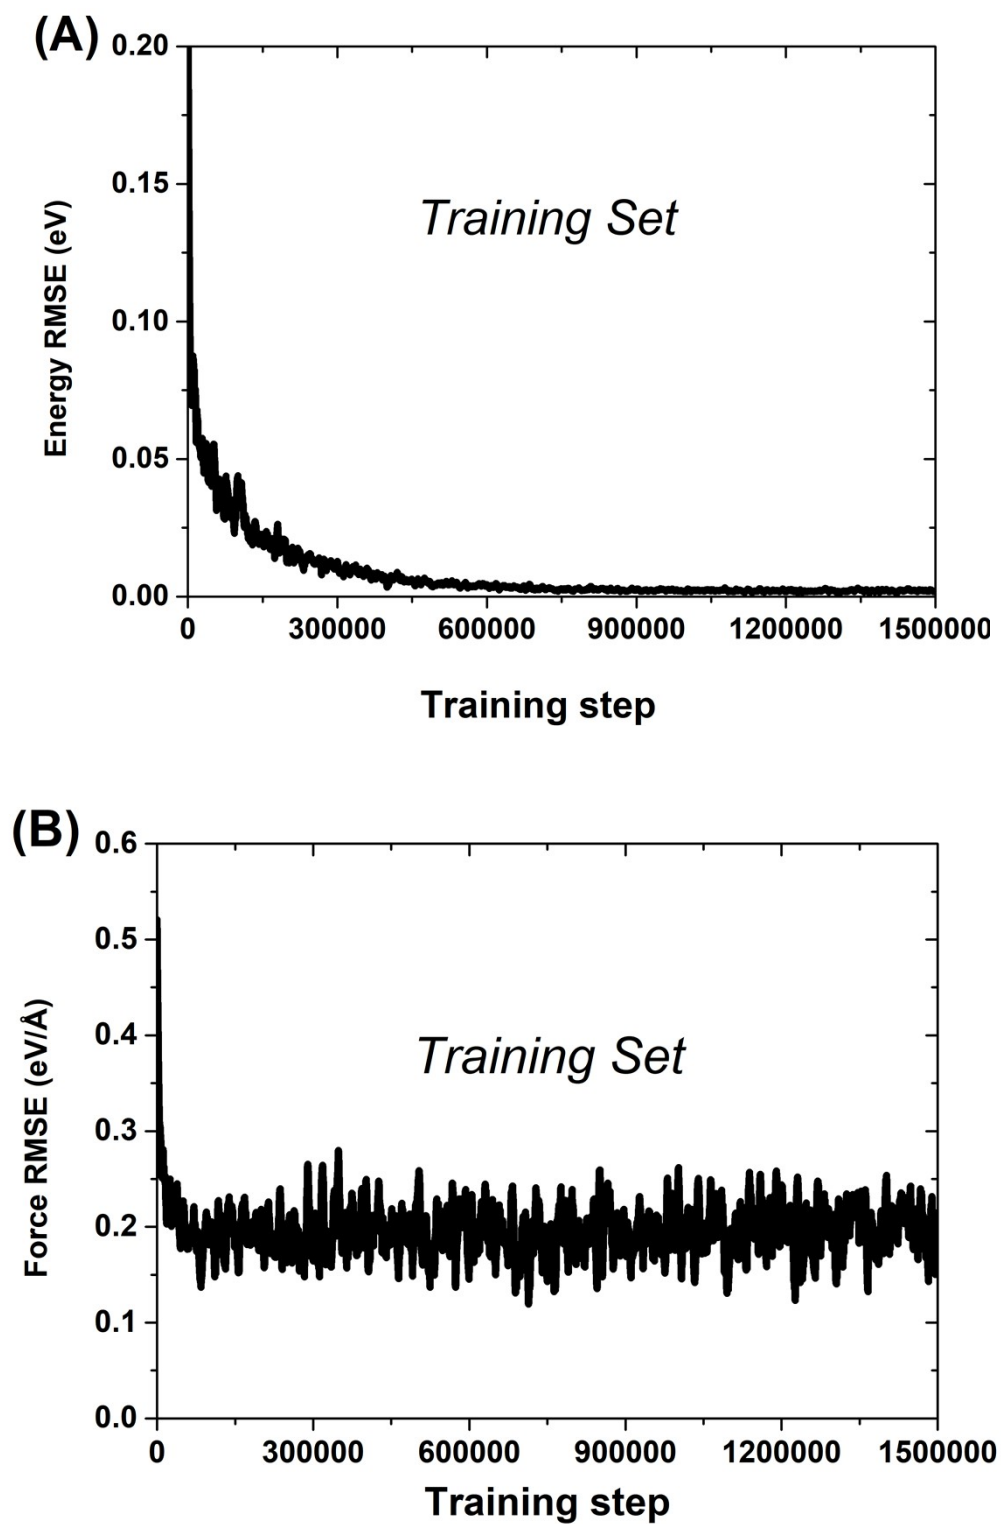

**Figure S2.** Learning curves of (A) energy and (B) force for validation set in terms of RMSE.

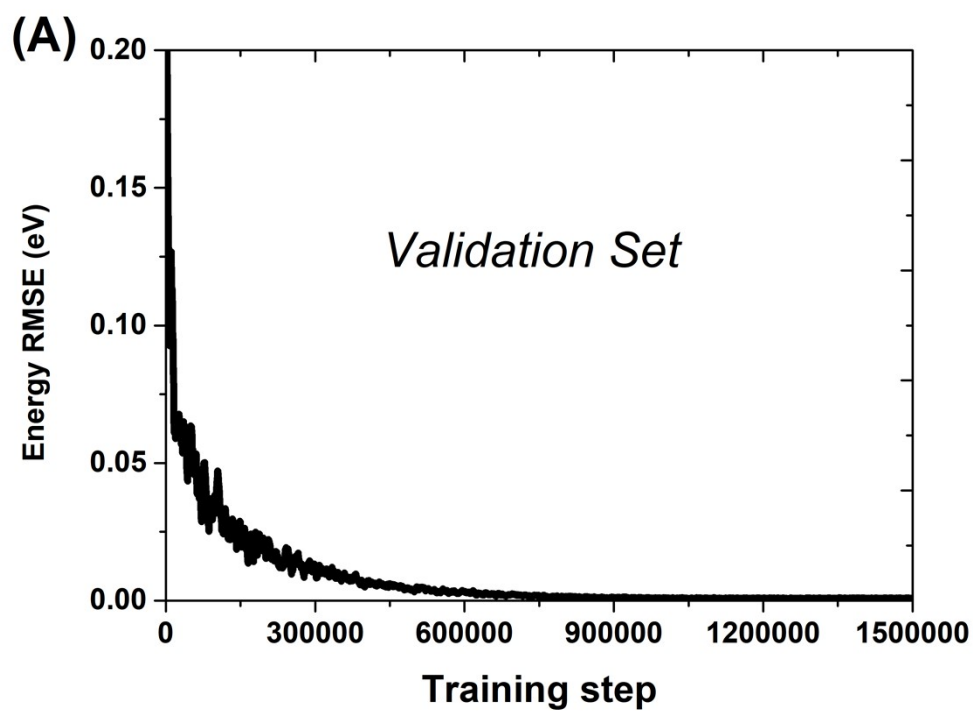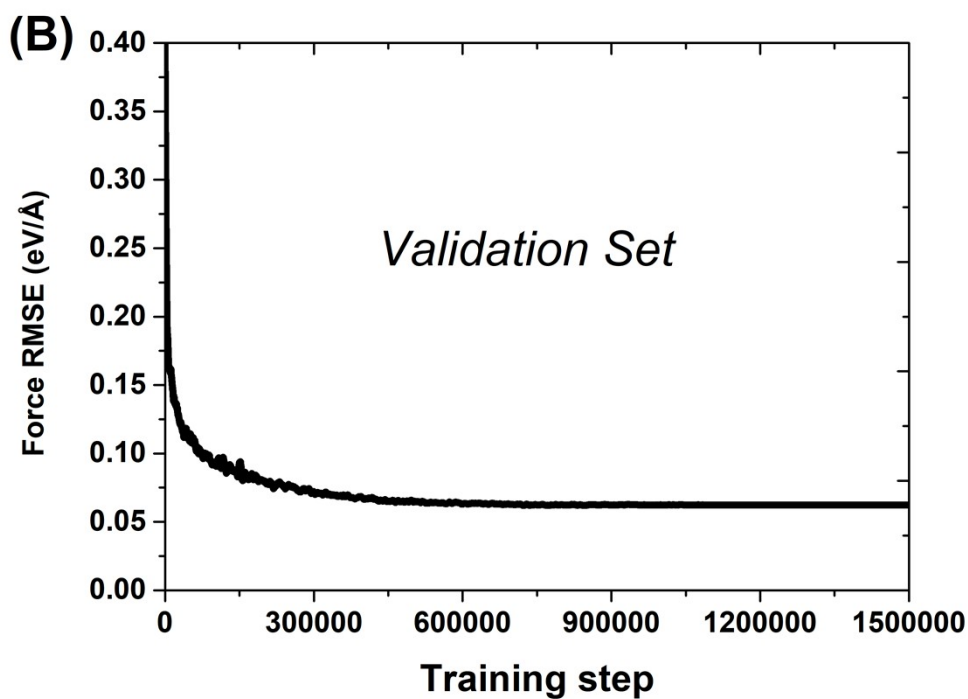

**Figure S3.** Radial distribution functions (RDFs) of (A) H-H, (B) O-H, (C) O-O, obtained from DFT-MD (SCAN) and DeePMD simulations (64 and 512 water molecules).

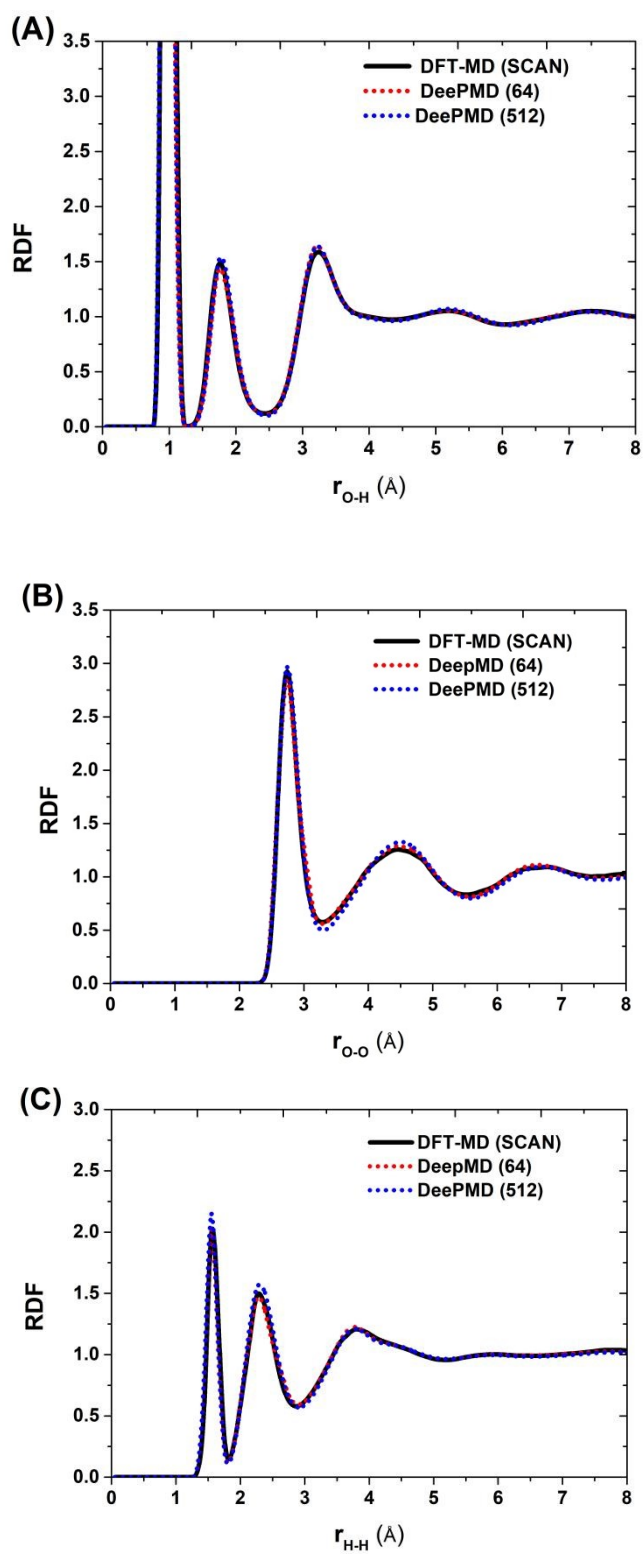

Supplement: d3cp03035k1.pdf [file d3cp03035k1.pdf]
